# Supplementary material for: Abnormal B-Cell Maturation and Increased Transitional B Cells in CBL Syndrome
Source: Frontiers journal article supplement (doi:10.3389/fped.2022.935951), 2022-07-28
Supplement: Table_2.DOCX [file Table_2.DOCX]

|  | **Pt1** | **Age-matched normal values** | **Pt2** | **Age-matched normal values** |
| --- | --- | --- | --- | --- |
| **Age, years** | 0.5 |  | 16 |  |
| **Hemoglobin, g/dl** | 12.1 | 11.5-13.5 | 13.2 | 12.0-16.0 |
| **Mean corpuscolar volume, fl** | 86.9 | 75-87 | 83.5 | 78-102 |
| **White blood cells, 109/l** | 23.61 | 5.2-11.0 | 8.48 | 4.4-8.1 |
| **Neutrophils109/l** | 9.43 | >1.5 | 6.57 | >1.5 |
| **Lymphocytes109/l** | 9.82 | 3.4-9.0 | 1.23 | 1.4-3.3 |
| **Monocytes109/l** | 3.69 | <1.0 | 0.58 | <1.0 |
| **Eosinophils109/l** | 0.51 | <0.5 | 0.07 | <0.5 |
| **Basophils109/l** | 0.17 | <0.1 | 0.02 | <0.1 |
| **Platelets109/l** | 111 | >140 | 156 | >140 |
| **HbF, %** | 1.1 | 3-15 | 0.9 | 0.1-1.2 |
| **IgG, mg/dl** | 622 | 351-919 | 1431 | 604-1909 |
| **IgA, mg/dl** | 29 | 10-85 | 172 | 61-301 |
| **IgM, mg/dl** | 49 | 38-204 | 119 | 59-297 |
| **IgEkU/l** | 956 | <33 | 84 | <33 |
| **CD3+109/l** | 3.3 | 1.9-5.9 | 809 | 0.72-2.56 |
| **CD4+109/l** | 2.77 | 1.4-4.3 | 546 | 0.27-1.88 |
| **HLADR+, %** | 3.9 | 0.8-6.1 | 2.3 | 1.6-12.2 |
| **Naïve CD45RA+CCR7+, %** | 78.8 | 68.8-91.7 | 51.3% | 20.4-63.6 |
| **RTE CD45RA+CCR7+CD31+, %** | 67.7 | 42.0-79.0 | 42.3 | 11.4-48.1 |
| **Centr. Mem. CD45RA-CCR7+, %** | 14.9 | 5.6-24.2 | 30.4 | 18.7-46.2 |
| **Eff Mem CD45RA-CCR7-, %** | 5.0 | 1.5-8.3 | 17.0 | 7.1-38.0 |
| **Term Diff CD45RA+CCR7-, %** | 0.9 | 0.3-5.9 | 1.2 | 0.3-9.1 |
| **CD8+109/l** | 0.27 | 0.5-1.7 | 0.16 | 0.18-0.78 |
| **HLADR+, %** | 3.4 | 1.6-30.2 | 2.2 | 2.7-31.7 |
| **Naïve CD45RA+CCR7+, %** | 78.6 | 37.9-90.7 | 39.7 | 13.1-66.5 |
| **Centr. Mem. CD45RA-CCR7+, %** | 3.9 | 2.0-13.0 | 5.0 | 2.6-24.5 |
| **Eff Mem CD45RA-CCR7-, %** | 6.3 | 1.3-27.2 | 40.0 | 10.1-47.4 |
| **Term Diff CD45RA+CCR7-, %** | 11.3 | 2.1-36.1 | 15.3 | 5.2-63.5 |
| **CD19+109/l** | 4.96 | 0.61-2.6 | 0.15 | 0.09-0.65 |
| **RBE CD38++CD10+, %** | 76.6 | 16.5-56.5 | 33.8 | 2.1-26.1 |
| **Naïve IgD+IgM+CD27-, %** | 17.3 | 32.2-66.9 | 50.5 | 33.7-74.0 |
| **CD19++CD21low, %** | 0.7 | 0.7-6.2 | 1.2 | 1.4-13.6 |
| **Sw Mem IgD-IgM-CD27+, %** | 0.32 | 0.12-2.3 | 6.4 | 2.8-23.4 |
| **IgM Mem IgD+IgM+CD27+, %** | 1.6 | 1.6-8.8 | 7.3 | 5.1-25.5 |
| **Term Diff CD38++CD27+CD20-, %** | 0.42 | 0.2-8.5 | 0.7 | 0.2-8.1 |
| **CD3-CD16+CD56+109/l** | 1.18 | 0.16-0.95 | 0.18 | 0.04-0.74 |
